# Supplementary material for: The Transcription Factor Rbf1 Is the Master Regulator for b-Mating Type Controlled Pathogenic Development in Ustilago maydis
Source: PLoS Pathog. 2010 Aug 5;6(8):e1001035. doi: 10.1371/journal.ppat.1001035 (PMC2916880; doi:10.1371/journal.ppat.1001035)
Supplement: Table S6 — Primer list. (0.02 MB XLS) [file ppat.1001035.s008.xls]

## Sheet: Sheet1
	Supplemental Table S6: Primers used in this study
	Primer	Sequence
	rbf1-deletion
	lb5'	5’-CGACTTGTACCACAATGAGGC-3’
	lb3'	5’-CACGGCCTGAGTGGCCTCACGATTCGTGATTCGGTG-3’
	rb5'	5’- GTGGGCCATCTAGGCCTCGACACCGCATCTCGCC-3’
	rb3'	5’-TCCGAGTCCGACGACAGC-3’
	rbf1-eGFP fusion -HA fusion
	GFP-lb-5'	5’-GGCTCATTGACTGACCTGG-3’
	GFP-lb-3'	5’- GGTGGCCGCGTTGGCCGCGGCGCTCTGCAGTTGAGAG -3’
	GFP-rb-5'	5’- GTGGGCCTGAGTGGCCTCGACACCGCATCTCGCC -3’
	GFP-rb-3'	5’- TCCGAGTCCGACGACAGC -3’
	rbf1-induction
	rbf1 start	5’- CATATGGACATCTTGGGTAAGTCC -3’
	rbf1 stop	5’- GCGGCCGCCTAGGCGCTCTGCAGTTGAG -3’
	lb1	5’-GAAGCTAGCGGAAAAGTGGGTGAG-3’
	rb2	5’-CCGTAGTTGTGCGAGAGCAGAGG-3’
	Realtime PCR analysis
	bW-f	5'-GATCTCACCCAGCCAATCAC-3'
	bW-r	5'-GAGTTGATCGAGGCCGAATG-3'
	bE-f	5'-GCACAACACCTTCCATTGAC-3'
	bE-r	5'-ACTGCTCCCGAATGTACT-3'
	rbf1-f	5'-AGTACGAGCTACGACGGATTC-3'
	rbf1-r	5'-GGGTAGGTGTTGGACACATTC-3'
	ppi-f	5’-ACGCCGATTCACTTCGTC-3’
	ppi-r	5’-TCTTGGCAGTCTTGGGAAC-3’
	RACE analysis
	5'-RACE	5’-AAAGCGCGAGTGTCGCGAAAG-3’
	5'-RACE-nested	5’-ACACATTCGGCTACTGTGGCTGAC-3’
	3'-RACE	5’-GCTGCCTACGGCTTTGAGATGC-3’
	3'-RACE-nested	5’-TGCCAGTATGGCGTACAGTGC-3’
	bE-3xHA fusion
	bE1_fw	5'-ACCAACGAATCCACAGCAAGAG-3'
	bE1_rev_sfi new	5'-GTTGGCCGCGTTGGCCGCGCCAAACGCAGTAGAAAGG-3'
	RF_fw_sfi	5'-ACTGGCCTGAGTGGCCCAGTGATACGTTTAGTCCCTTTG-3'
	RF_rev	5'-CGATCCGTAGTTGTGCGAGAG-3'
	bE1_fw_nested	5'-CACAGCAAGAGTTGGCCAGTCC-3'
	RF_re_nested	5'-TGCGAGAGCAGAGGTTGAAGG-3'
	ChIP rbf1 promoter
	Rbf1_bbs1_f	5'-CTTGAGCTGTGGACGAGGCT-3'
	Rbf1_bbs1_r	5'-CACGAATCACGAATCACGTATGG-3'
	Rbf1_bbs2_f	5'-GCATGCCGGTTGCTGATGTG-3'
	Rbf1_bbs2_r	5'-TCCGAGCAAAGCACTGAGAGT-3'
	Rbf1_bbs3_f	5'-GTGCATGAGGCAAACGGGCTT-3'
	Rbf1_bbs3_r	5'-TGAGGATGCCCTTTTGCTTGAC-3'
	Rbf1_down_bbs_f	5'-GCCCGAGCCTACTGTGTTTG-3'
	Rbf1_down_bbs_r	5'-AGCAGGGACAGCTGAACTCAC-3'
	Rbf1_up2_bbs_f	5'-ATGCGAACAGACAAGTGGCATG-3'
	Rbf1_up2_bbs_r	5'-GTGGTTGCGAATGGACCTACG-3'
	RT_eIF2b_f	5'-ATCCCGAACAGCCCAAAC-3'
	RT_eIF2b_r	5'-ATCGTCAACCGCAACCAC-3'
	RT_actin_f	5'-CATGTACGCCGGTATCTCG-3'
	RT_actin_r	5'-CTCGGGAGGAGCAACAATC-3'
	ChIPdik6 promoter
	1f	5'-CCATGATGCGGGAGTAGACACT-3'
	1r	5'-ATCGCGCTCCCAGTGACAAGA-3'
	2f	5'-TTCCGTTGATCCTCCTCAGATACG-3'
	2r	5'-GCAAGGATGCTTTGATCATCTCAGG-3'
	3f	5'-CCTGAGATGATCAAAGCATCCTTGC-3'
	3r	5'-GGCACGCTGTCCTGGTGACAT-3'
	4f	5'-ATGTCACCAGGACAGCGTGCC-3'
	4r	5'-CGTGACGACAATCGTGAATCACGA-3'
	5f	5'-TCGTGATTCACGATTGTCGTCACG-3'
	5r	5'-GCATTGTTCAAATGTACGTGGTGTG-3'
	6f	5'-CACACCACGTACATTTGAACAATGC-3'
	6r	5'-GTCGAGCGTCAGCTGGCTGAA-3'
	7f	5'-TTCAGCCAGCTGACGCTCGAC-3'
	7r	5'-CGGAAGGTTACACCGTGCAAGC-3'
	8f	5'-GCTTGCACGGTGTAACCTTCCG-3'
	8r	5'-CCTGACAACATTCACCGTTTGAAGA-3'
	9f	5'-TCTTCAAACGGTGAATGTTGTCAGG-3'
	9r	5'-GGTATATATGCTTCAGCTTGGCTTGC-3'
	10f	5'-GCAAGCCAAGCTGAAGCATATATACC-3'
	10r	5'-GGATCGAATGGCTGTCTGTATCGC-3'
	11f	5'-TTGTTCCACCCATCCTTCACGC-3'
	11r	5'-GGATCGAGCGTCGAAACACAGC-3'
	Drbf1 complementation
	Rbf1up1_f	5'-CGATTCATTAATGCAGGTTAAGCGGCCGGCCGGGAGCTCGCAATAGGTTACGAG-3'
	Rbf1up1_r	5'-CGTCCGTCGCTCGCGTTTGT-3'
	Rbf1up2_f	5'-ACAAACGCGAGCGACGGACGTGCTCCTCGTCAGAATTTCCATAC-3'
	Rbf1down_3_r	5'-TGGACTTACCCAAGATGTCATATGTTTGGCAAACTGTTTATCGACG-3'
	dik6 promoter - internal deletions
	dik6_nde_f	5'-TCACCATATGGTTGCTGGGATCGAATGGCTGT-3'
	dik6_fse_r	5'-TAAGCGGCCGGCCGAATTCAAGGACCCAGTTGTTGATC-3'
	d6_422-522-Up	5'-TCGCACTGTATGTCGCTTTGACCCCCTTTCCACAGAATGTGTAGCAAG-3'
	d6_422-522-down	5'-CTTGCTACACATTCTGTGGAAAGGGGGTCAAAGCGACATACAGTGC-3'
	d5_500-601_up	5'-CAAGTTAAGCTCGCGCCTGGACTGCAATGCACAAGCGCTTTGCACA-3'
	d5_500-601_down	5'-TATGTGCAAAGCGCTTGTGCATTGCAGTCCAGGCGCGAGCTTAA-3'
	d4_576-700_up	5'-CGTTTATTGATTTGACCCAGCCCAGAGTCGATCATGCCAGTTGAGC-3'
	d4_576-700_down	5'-AAGCTCAACTGGCATGATCGACTCTGGGCTGGGTCAAATCAATAAACG-3'
